# Supplementary material for: The Use of Star Anise-Cinnamon Essential Oil as an Alternative Antibiotic in Prevention of Salmonella Infections in Yellow Chickens
Source: MDPI journal article supplement (doi:10.3390/antibiotics11111579), 2022-11-09
Supplement: s1 [file s1]

**Table S1.** The body weight (BW) of birds in different groups

| Number     | Group A (challenged-treated) <sup>1</sup> |                             |                             | Group B (challenge-untreated) <sup>2</sup> |                             |                             | Group C<br>(unchallenge-<br>untreated) |
|------------|-------------------------------------------|-----------------------------|-----------------------------|--------------------------------------------|-----------------------------|-----------------------------|----------------------------------------|
|            | Subgroup<br>A1 <sup>3</sup>               | Subgroup<br>A2 <sup>4</sup> | Subgroup<br>A3 <sup>5</sup> | Subgroup<br>B1 <sup>3</sup>                | Subgroup<br>B2 <sup>4</sup> | Subgroup<br>B3 <sup>5</sup> |                                        |
| 1          | 484.6 g                                   | 442.2 g                     | 434.6 g                     | 396.6 g                                    | 439.4 g                     | 380.2 g                     | 488.2 g                                |
| 2          | 417.6 g                                   | 495.2 g                     | 500.1 g                     | 407.4 g                                    | 378.5 g                     | 437.2 g                     | 514.2 g                                |
| 3          | 407.6 g                                   | 493.5 g                     | 447.5 g                     | 362.1 g                                    | 372 g                       | 430.1 g                     | 486.3 g                                |
| 4          | 479.3 g                                   | 547.2 g                     | 477.8 g                     | 501.2 g                                    | 346.2 g                     | 431.2 g                     | 441.2 g                                |
| 5          | 391.2 g                                   | 502.3 g                     | 463.5 g                     | 422.5 g                                    | 343.5 g                     | 418.2 g                     | 502.9 g                                |
| 6          | 407.6 g                                   | 453.1 g                     | 429.7 g                     | 348.9 g                                    | 364.2 g                     | 323 g                       | 542.9 g                                |
| 7          | 551.6 g                                   | 429.1 g                     | 427.1 g                     | 253.9 g                                    | 311.9 g                     | 429.5 g                     | 488.4 g                                |
| 8          | 415.1 g                                   | 520.2 g                     | 433.2 g                     | 383.5 g                                    | 409.8 g                     | 386.5 g                     | 477.4 g                                |
| 9          | 463.9 g                                   | 485.1 g                     | 437.8 g                     | 472.1 g                                    | 448.6 g                     | 436.3 g                     | 470.7 g                                |
| 10         | 478.2 g                                   | 548.9 g                     | 439.2 g                     | 295.9 g                                    | 451.7 g                     | 382 g                       | 562.2 g                                |
| Average BW | 449.67 g                                  | 491.68 g                    | 449.05 g                    | 384.41 g                                   | 386.58 g                    | 405.42 g                    | 497.44 g                               |

<sup>1</sup> Star anise-cinnamon essential oil (SCEO) was supplemented in the drinking water.

<sup>2</sup> No SCEO was supplemented in the drinking water.

<sup>3</sup> *Salmonella pullorum* challenged group.

<sup>4</sup> *Salmonella give* challenged group.

<sup>5</sup> *Salmonella kentucky* challenged group.
