# Supplementary material for: The Use of Star Anise-Cinnamon Essential Oil as an Alternative Antibiotic in Prevention of Salmonella Infections in Yellow Chickens
Source: MDPI journal article supplement (doi:10.3390/antibiotics11111579), 2022-11-09
Supplement: s1 [file s1]

**Table S2.** The isolation rates of *Salmonella* in the birds in the *Salmonella pullorum*, *Salmonella give* and *Salmonella kentucky* challenged groups

| Challenge strain           | Group A<br>(challenged-treated) <sup>1</sup> | Group B<br>(challenge-untreated) <sup>2</sup> |
|----------------------------|----------------------------------------------|-----------------------------------------------|
| <i>Salmonella pullorum</i> | 50%                                          | 90%                                           |
| <i>Salmonella give</i>     | 40%                                          | 80%                                           |
| <i>Salmonella kentucky</i> | 80%                                          | 90%                                           |

Note: If *Salmonella* is isolated from any samples of cloaca swabs, cecum and mixture organs in a bird, the bird is determined to be a *salmonella* carrier.

<sup>1</sup> Star anise-cinnamon essential oil (SCEO) was supplemented in the drinking water.

<sup>2</sup> No SCEO was supplemented in the drinking water.

**Table S3.** The isolation rates of *Salmonella pullorum* in the bird's different organs in the *Salmonella pullorum* challenged subgroups

| Number | Subgroup A1 <sup>1</sup>    |       |             | Subgroup B1 <sup>2</sup> |       |             |
|--------|-----------------------------|-------|-------------|--------------------------|-------|-------------|
|        | Mixture organs <sup>3</sup> | cecum | Cloaca swab | Mixture organs           | cecum | Cloaca swab |
| 1      | +                           | -     | -           | +                        | -     | -           |
| 2      | +                           | +     | -           | -                        | +     | -           |
| 3      | -                           | -     | -           | +                        | -     | -           |
| 4      | -                           | +     | -           | +                        | -     | -           |
| 5      | -                           | -     | -           | +                        | -     | -           |
| 6      | -                           | -     | -           | -                        | +     | -           |
| 7      | +                           | +     | -           | +                        | +     | +           |
| 8      | +                           | -     | -           | +                        | +     | +           |
| 9      | -                           | -     | -           | -                        | -     | -           |
| 10     | -                           | -     | -           | +                        | +     | +           |
| Total  | 40.0%                       | 30%   | 0%          | 70%                      | 50%   | 30%         |

<sup>1</sup> Star anise-cinnamon essential oil (SCEO) was supplemented in the drinking water.

<sup>2</sup> No SCEO was supplemented in the drinking water.

<sup>+</sup>: *Salmonella* was detected.

<sup>-</sup>: No *Salmonella* was detected.

<sup>3</sup>: Mixture organs refers to the mixture of visceral parenchyma organs including heart, liver and spleen.

**Table S4.** The isolation rates of *Salmonella give* in the bird's different organs in the *Salmonella give* challenged subgroups

| Number | Subgroup A2 <sup>1</sup>    |       |             | Subgroup B2 <sup>2</sup> |       |             |
|--------|-----------------------------|-------|-------------|--------------------------|-------|-------------|
|        | Mixture organs <sup>3</sup> | cecum | Cloaca swab | Mixture organs           | cecum | Cloaca swab |
| 1      | -                           | -     | -           | +                        | -     | -           |
| 2      | +                           | -     | -           | -                        | +     | -           |
| 3      | -                           | +     | -           | -                        | -     | -           |
| 4      | -                           | +     | -           | -                        | +     | -           |
| 5      | -                           | -     | -           | +                        | -     | -           |
| 6      | -                           | -     | -           | -                        | -     | -           |
| 7      | -                           | -     | -           | -                        | +     | +           |
| 8      | -                           | -     | -           | +                        | -     | +           |
| 9      | -                           | -     | -           | +                        | +     | -           |
| 10     | +                           | -     | -           | -                        | +     | -           |
| Total  | 20%                         | 20%   | 0%          | 40%                      | 50%   | 20%         |

<sup>1</sup> Star anise-cinnamon essential oil (SCEO) was supplemented in the drinking water.

<sup>2</sup> No SCEO was supplemented in the drinking water.

<sup>3</sup>:Mixture organs refers to the mixture of visceral parenchyma organs including heart, liver and spleen.

<sup>+</sup>: *Salmonella* was detected.

<sup>-</sup>: No *Salmonella* was detected.

**Table S5.** The isolation rates of *Salmonella kentucky* in the bird's different organs in the *Salmonella kentucky* challenged subgroups

| Number | Subgroup A3 <sup>1</sup>    |       |             | Subgroup B3 <sup>2</sup> |       |             |
|--------|-----------------------------|-------|-------------|--------------------------|-------|-------------|
|        | Mixture organs <sup>3</sup> | cecum | Cloaca swab | Mixture organs           | cecum | Cloaca swab |
| 1      | -                           | +     | +           | +                        | +     | -           |
| 2      | +                           | +     | +           | +                        | -     | +           |
| 3      | -                           | -     | +           | -                        | -     | -           |
| 4      | -                           | -     | -           | +                        | -     | +           |
| 5      | -                           | -     | -           | -                        | +     | -           |
| 6      | -                           | +     | +           | -                        | +     | -           |
| 7      | -                           | +     | -           | +                        | -     | -           |
| 8      | -                           | +     | +           | +                        | +     | -           |

|       |     |     |     |     |     |     |
|-------|-----|-----|-----|-----|-----|-----|
| 9     | -   | +   | +   | +   | +   | +   |
| 10    | +   | +   | -   | -   | +   | -   |
| Total | 20% | 70% | 60% | 60% | 60% | 30% |

<sup>1</sup> Star anise-cinnamon essential oil (SCEO) was supplemented in the drinking water.

<sup>2</sup> No SCEO was supplemented in the drinking water.

<sup>3</sup>:Mixture organs refers to the mixture of visceral parenchyma organs including heart, liver and spleen.

<sup>+</sup>: *Salmonella* was detected.

<sup>-</sup>: No *Salmonella* was detected.
